# Supplementary material for: Intrinsic DNA curvature in trypanosomes
Source: PubMed Central journal article supplement (PMC5679330; doi:10.1186/s13104-017-2908-y), 2017-11-09

*Chromosome 1*

*IC*

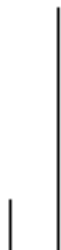

*RIIC*

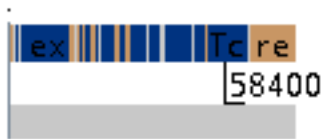

Chromosome 2

IC

RIIC

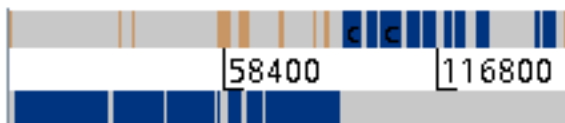

Chromosome 3

IC

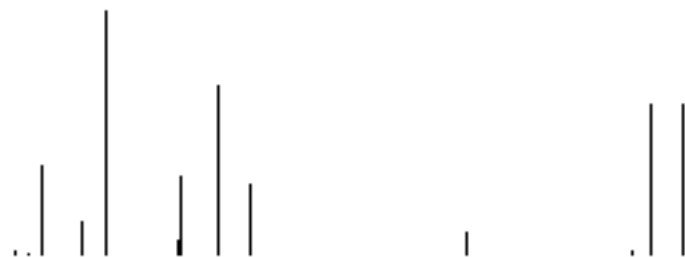

RIIC

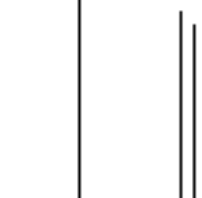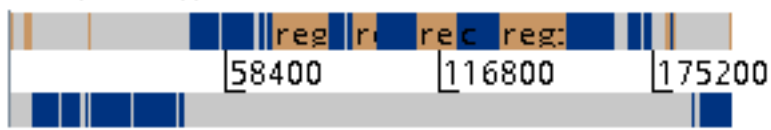

Chromosome 4

IC

RIIC

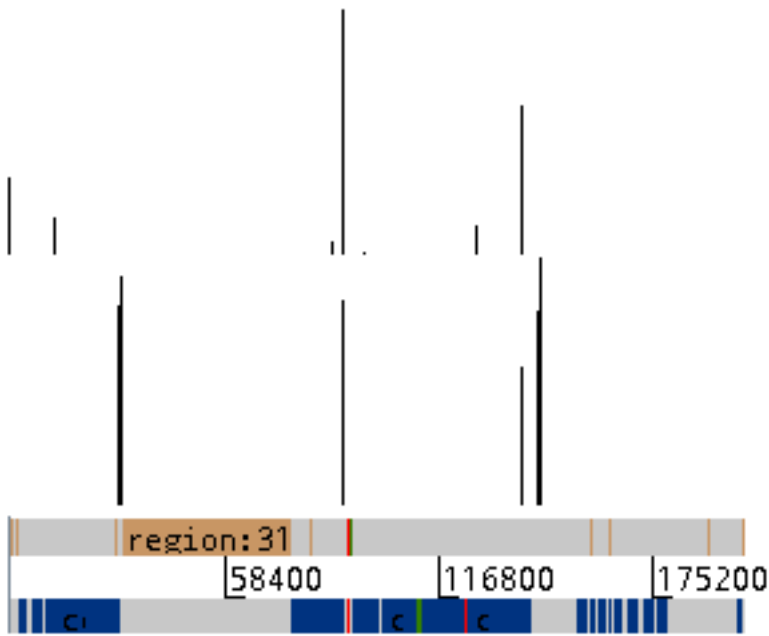

Chromosome 5

IC

RIIC

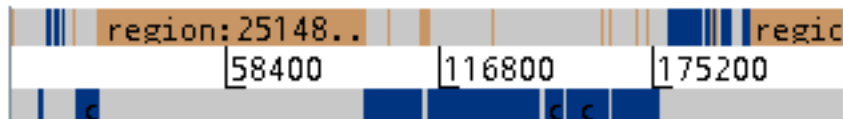

Chromosome 6

IC

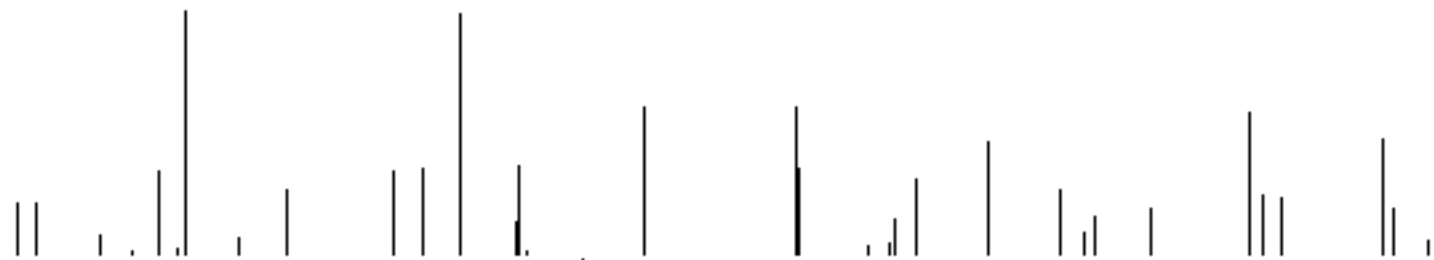

RIIC

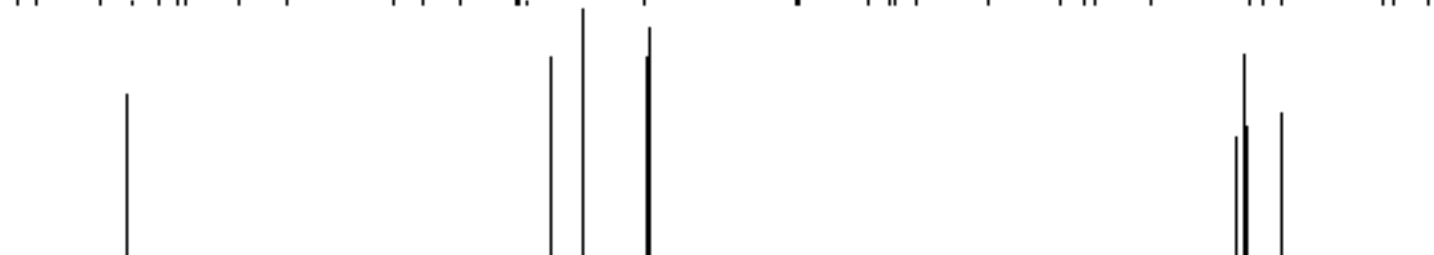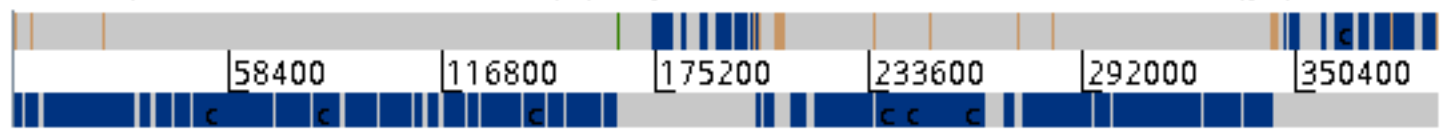

Chromosome 7

IC

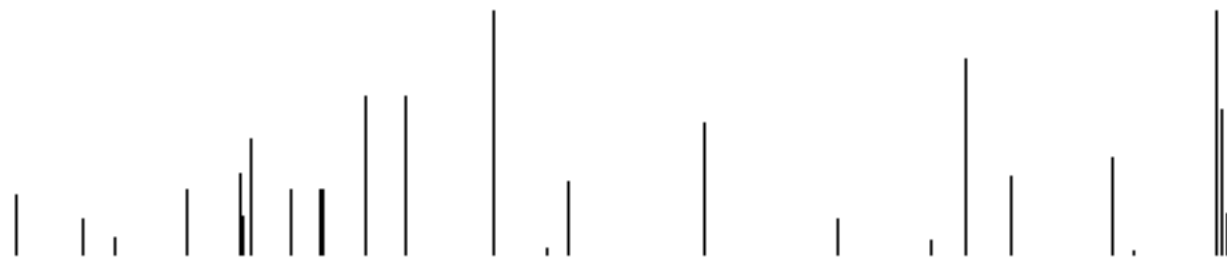

RIIC

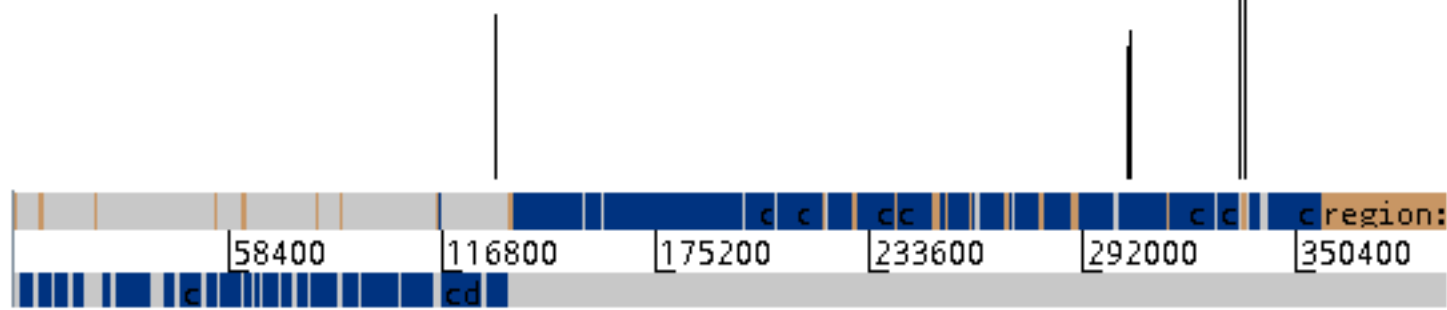

Chromosome 8

IC

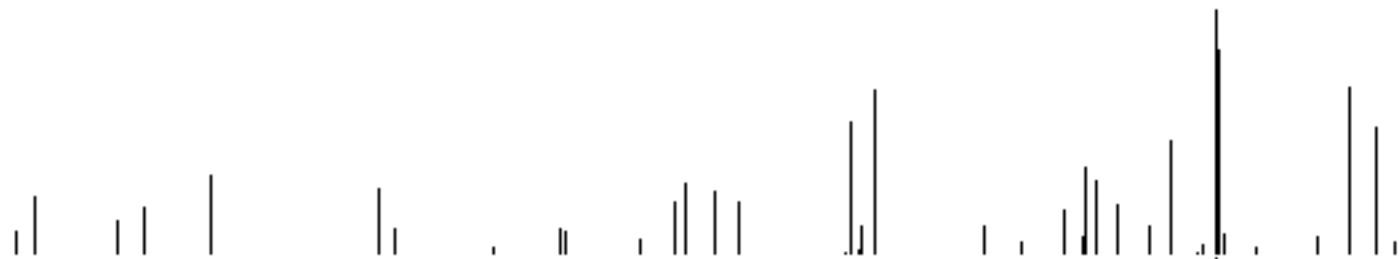

RIIC

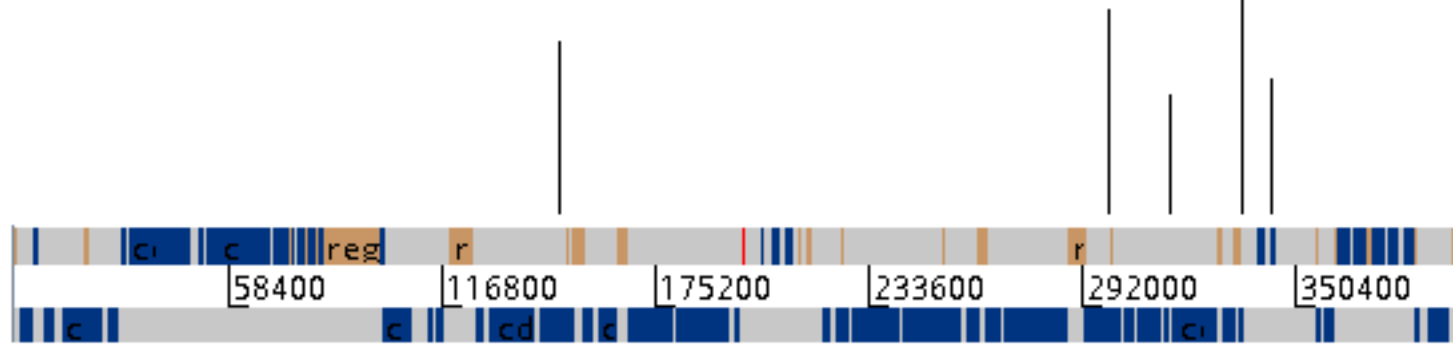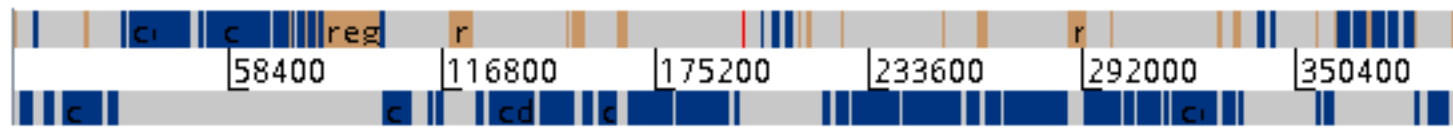



Chromosome 9

IC

RIIC

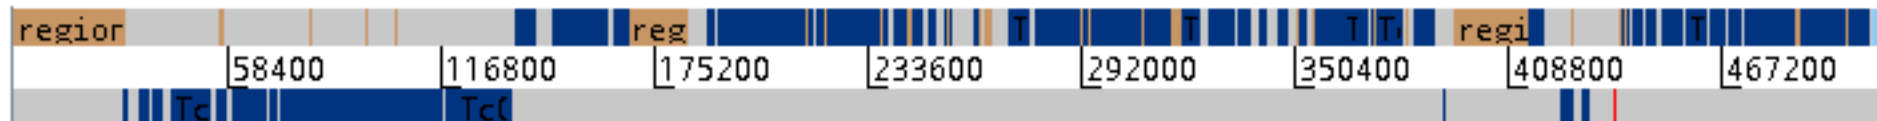

Chromosome 10

IC

RIIC

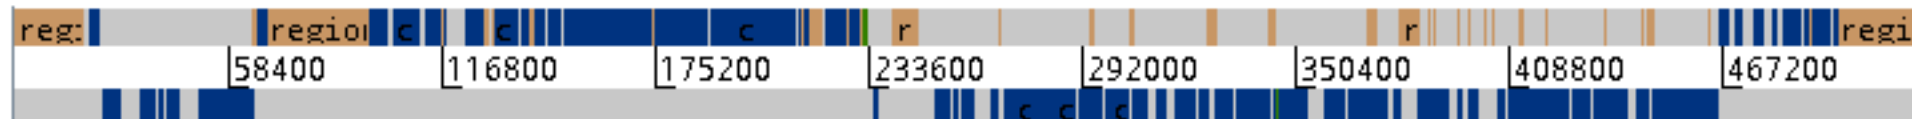

Chromosome 11

IC

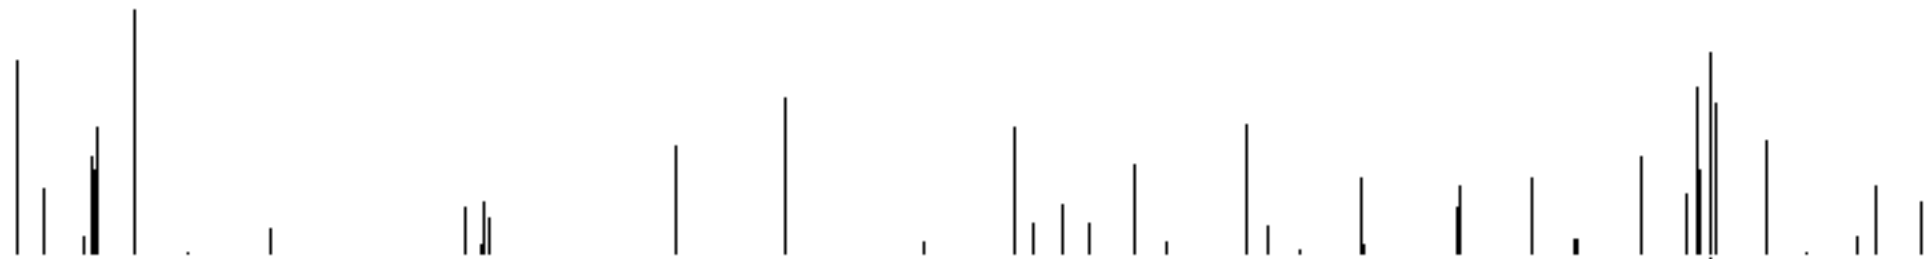

RIIC

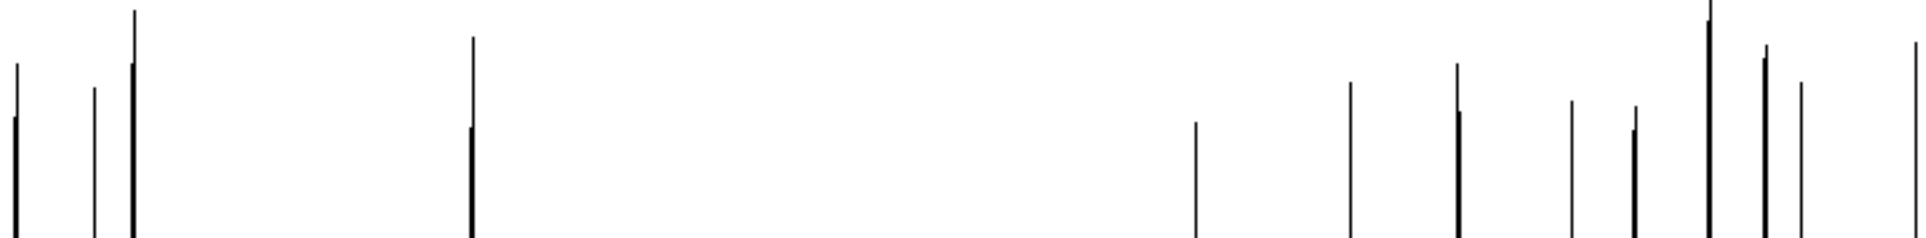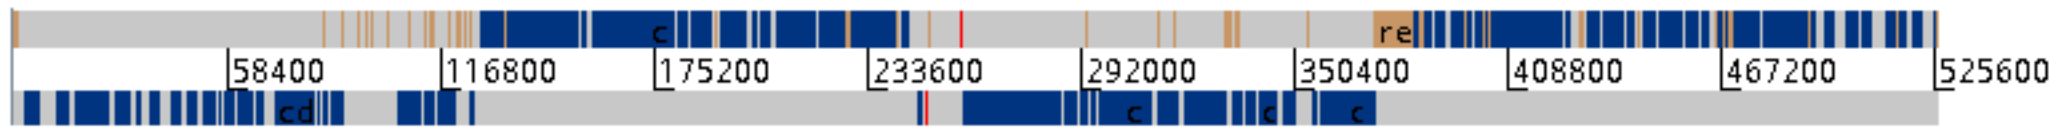

Chromosome 12

IC

RIIC

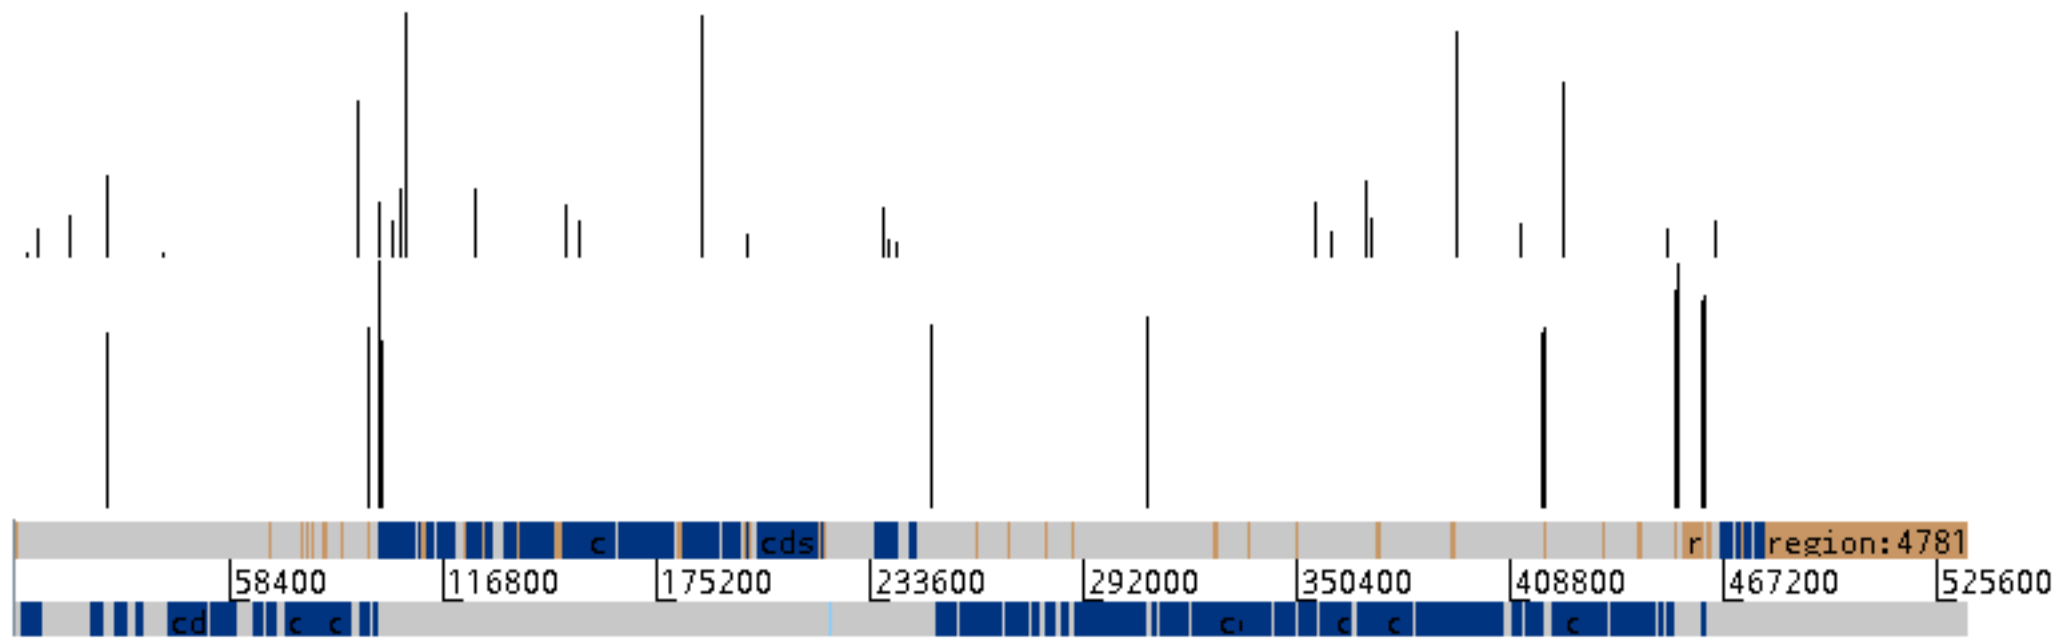

Chromosome 13

IC

RIIC

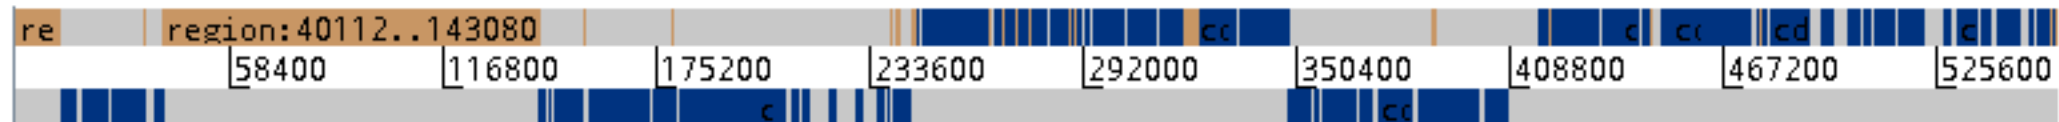

Chromosome 14

IC

RIIC

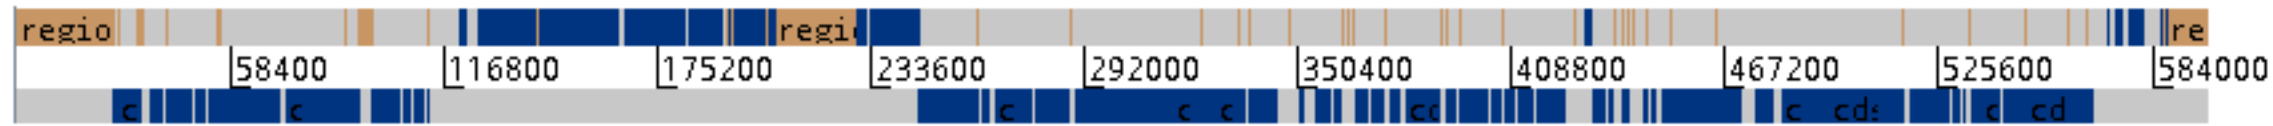

Chromosome 15

IC

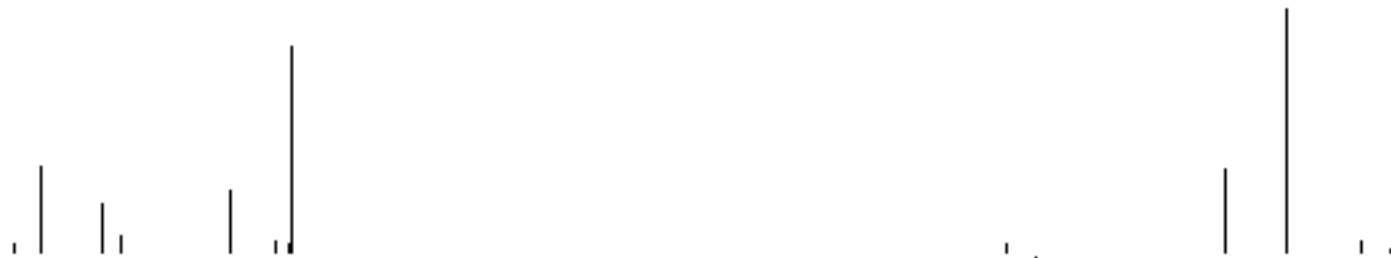

RIIC

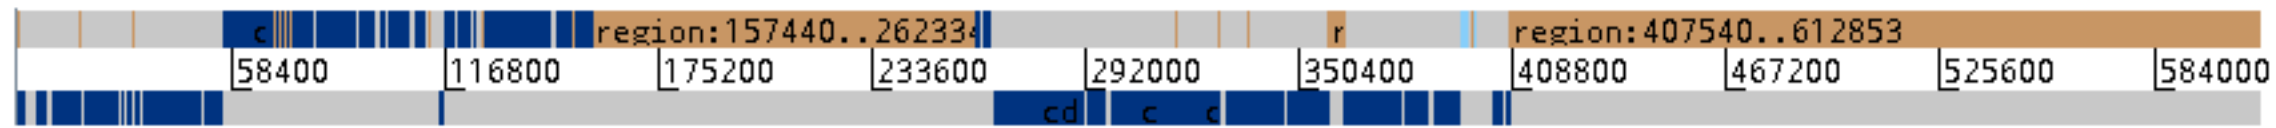

Chromosome 16

IC

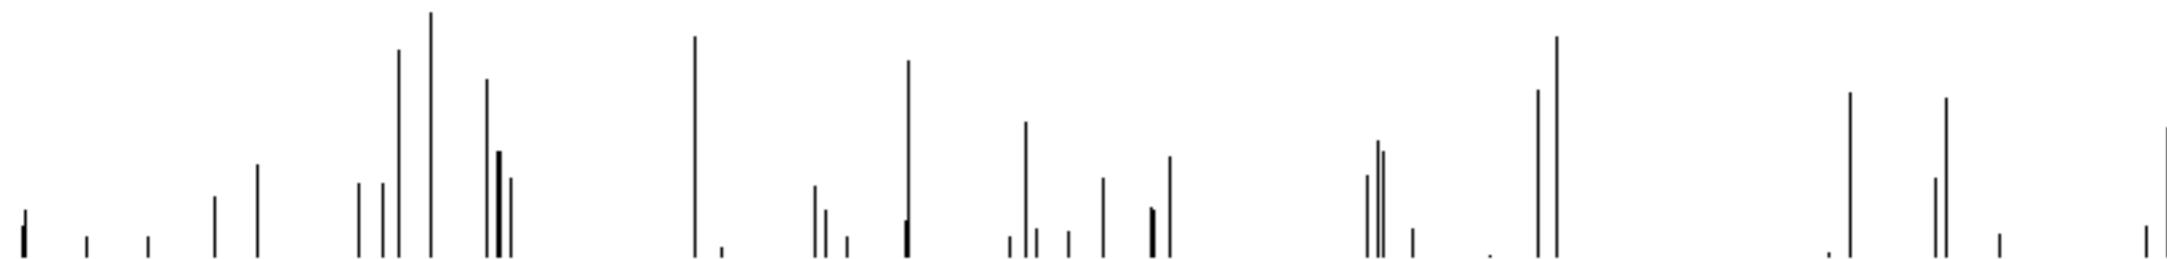

RIIC

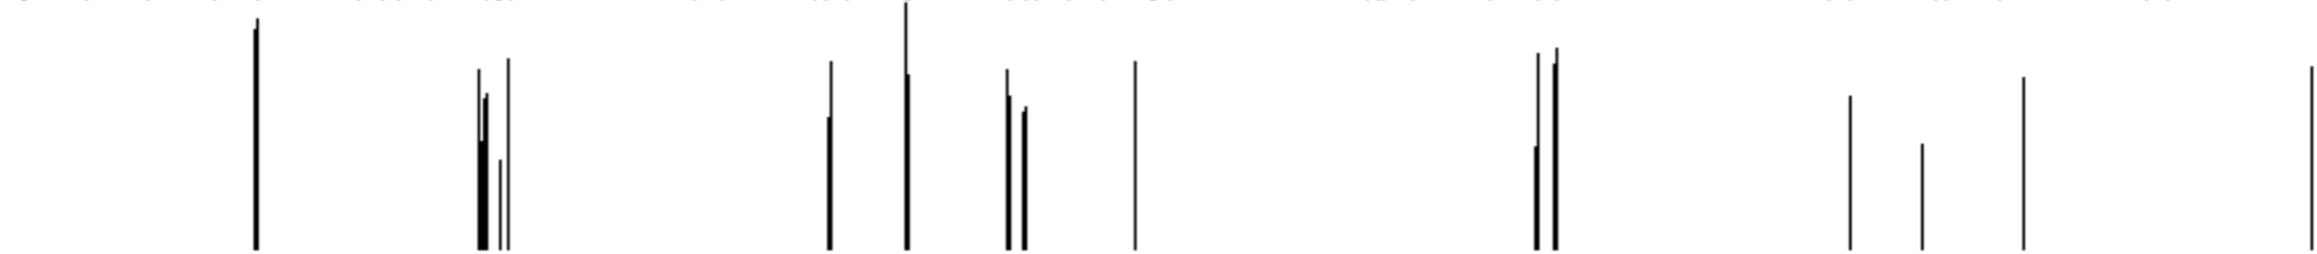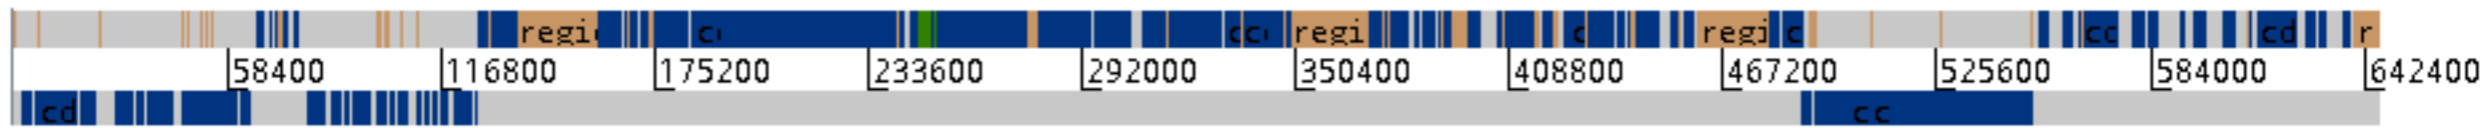



Chromosome 17

IC

RIIC

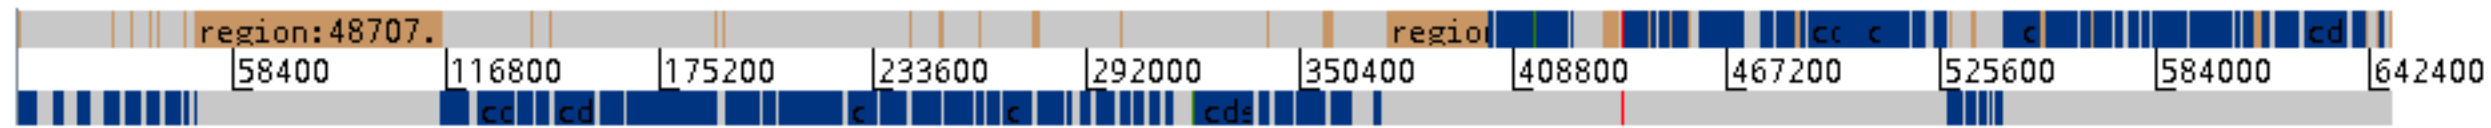

Chromosome 18

IC

RIIC

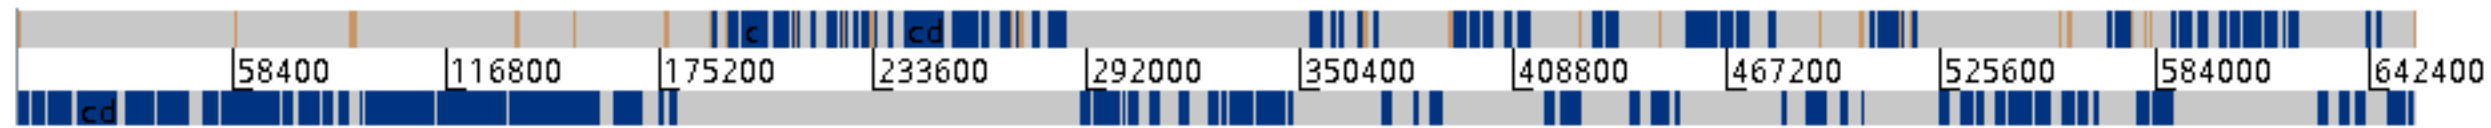

Chromosome 19

IC

RIIC

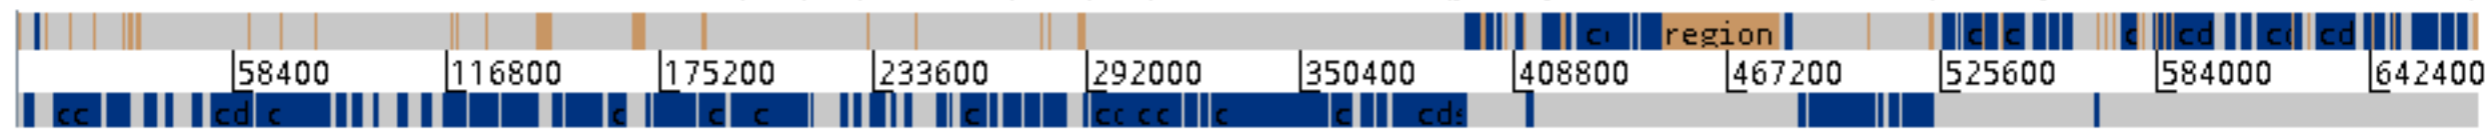

Chromosome 20

IC

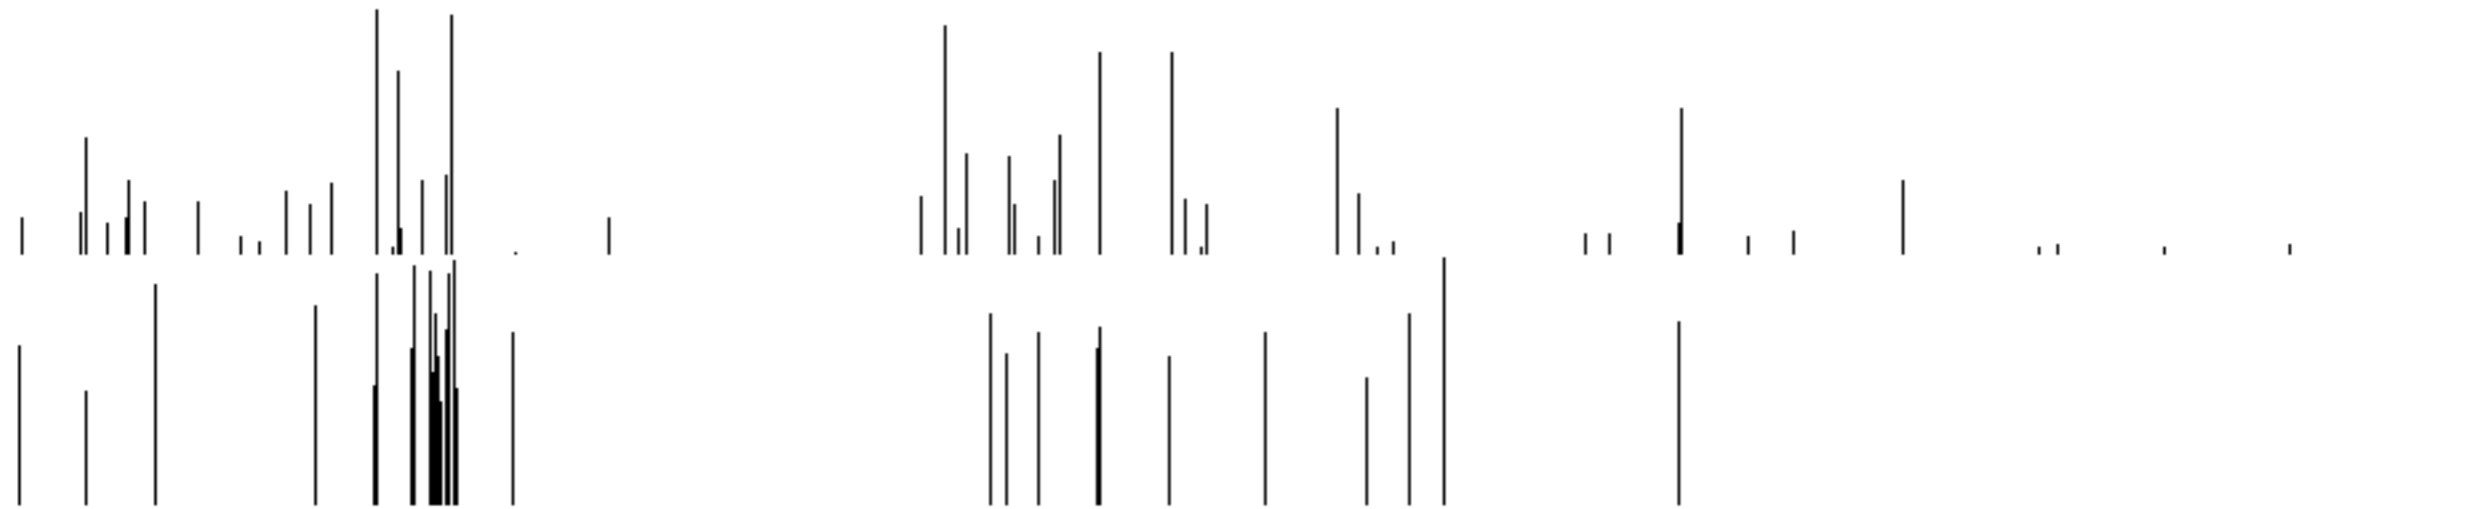

RIIC

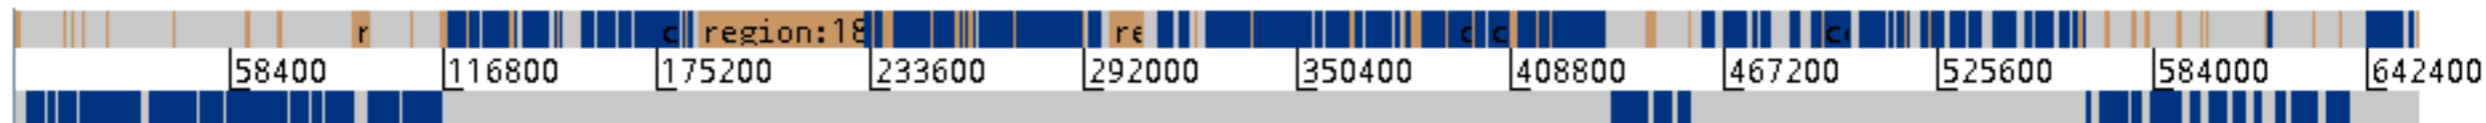

Chromosome 21

IC

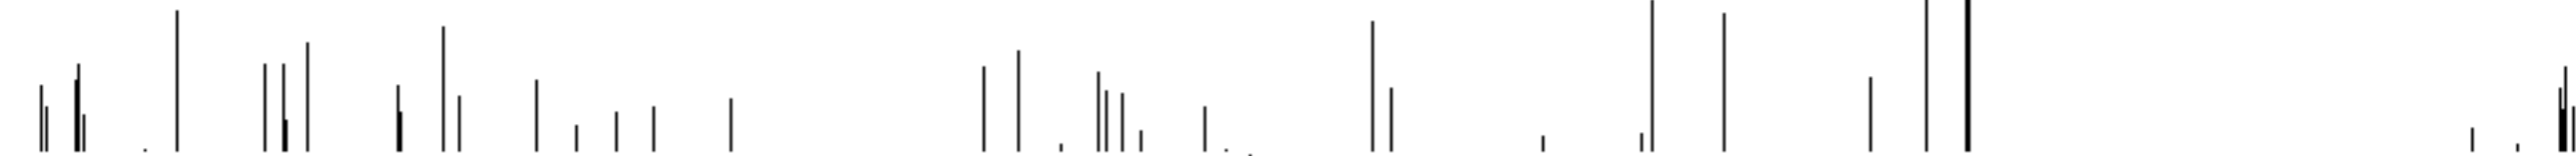

RIIC

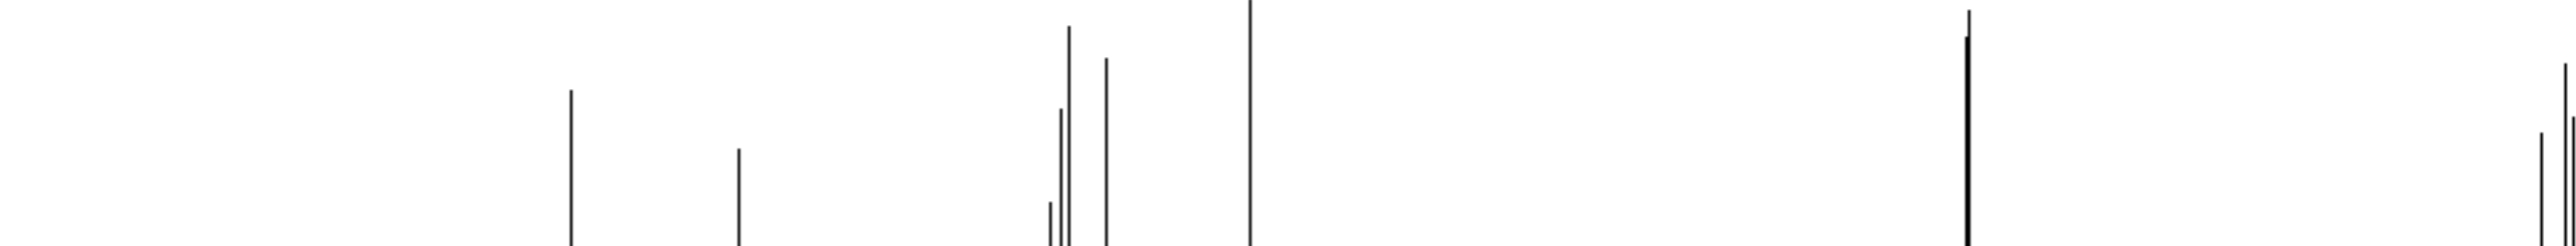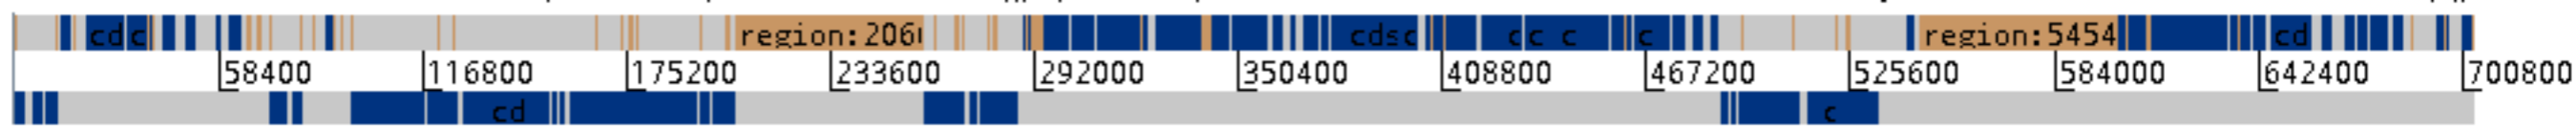

Chromosome 22

IC

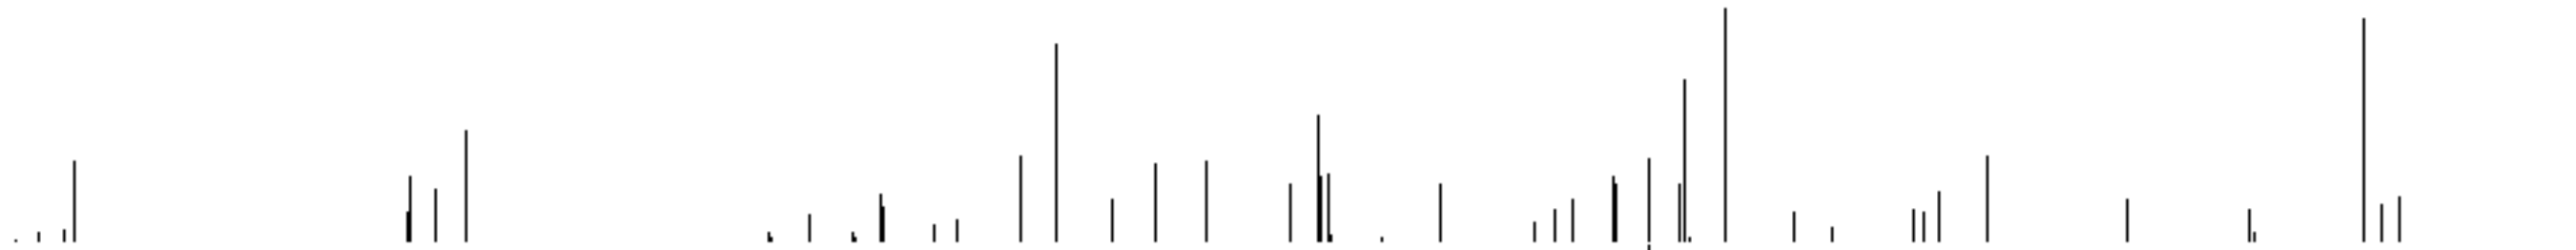

RIIC

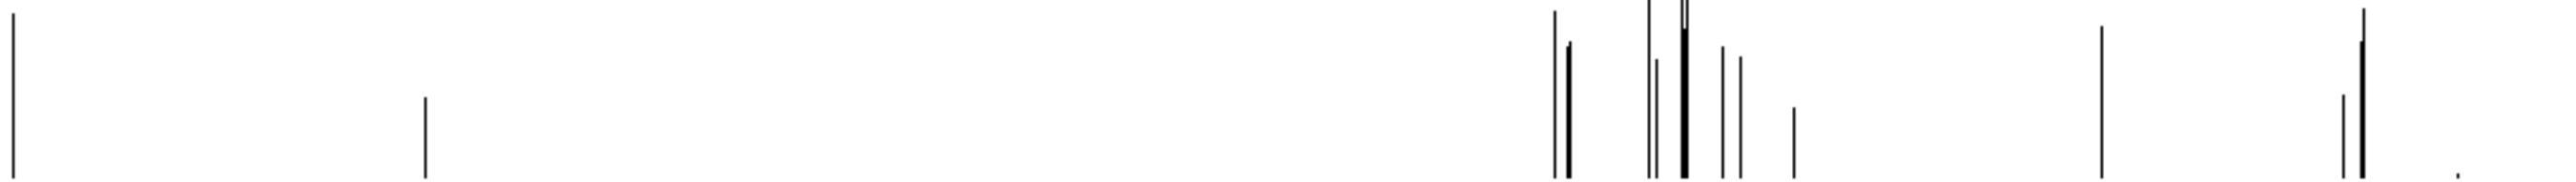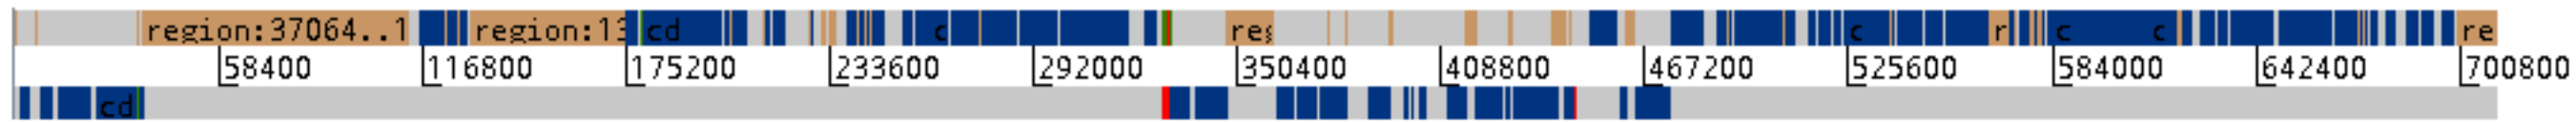

Chromosome 23

IC

RIIC

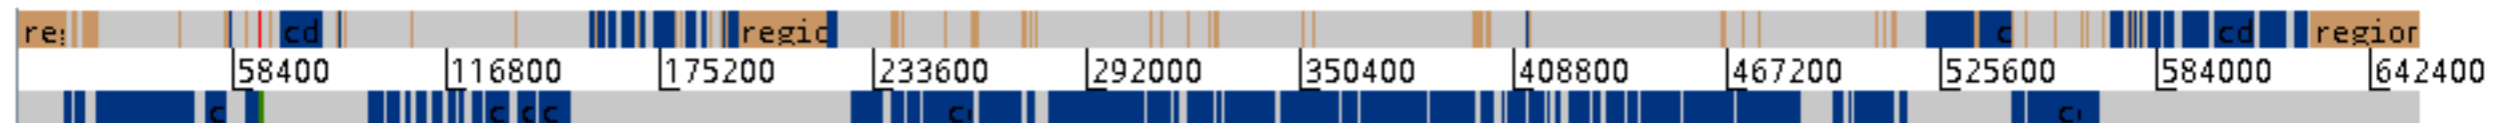

Chromosome 24

IC

RIIC

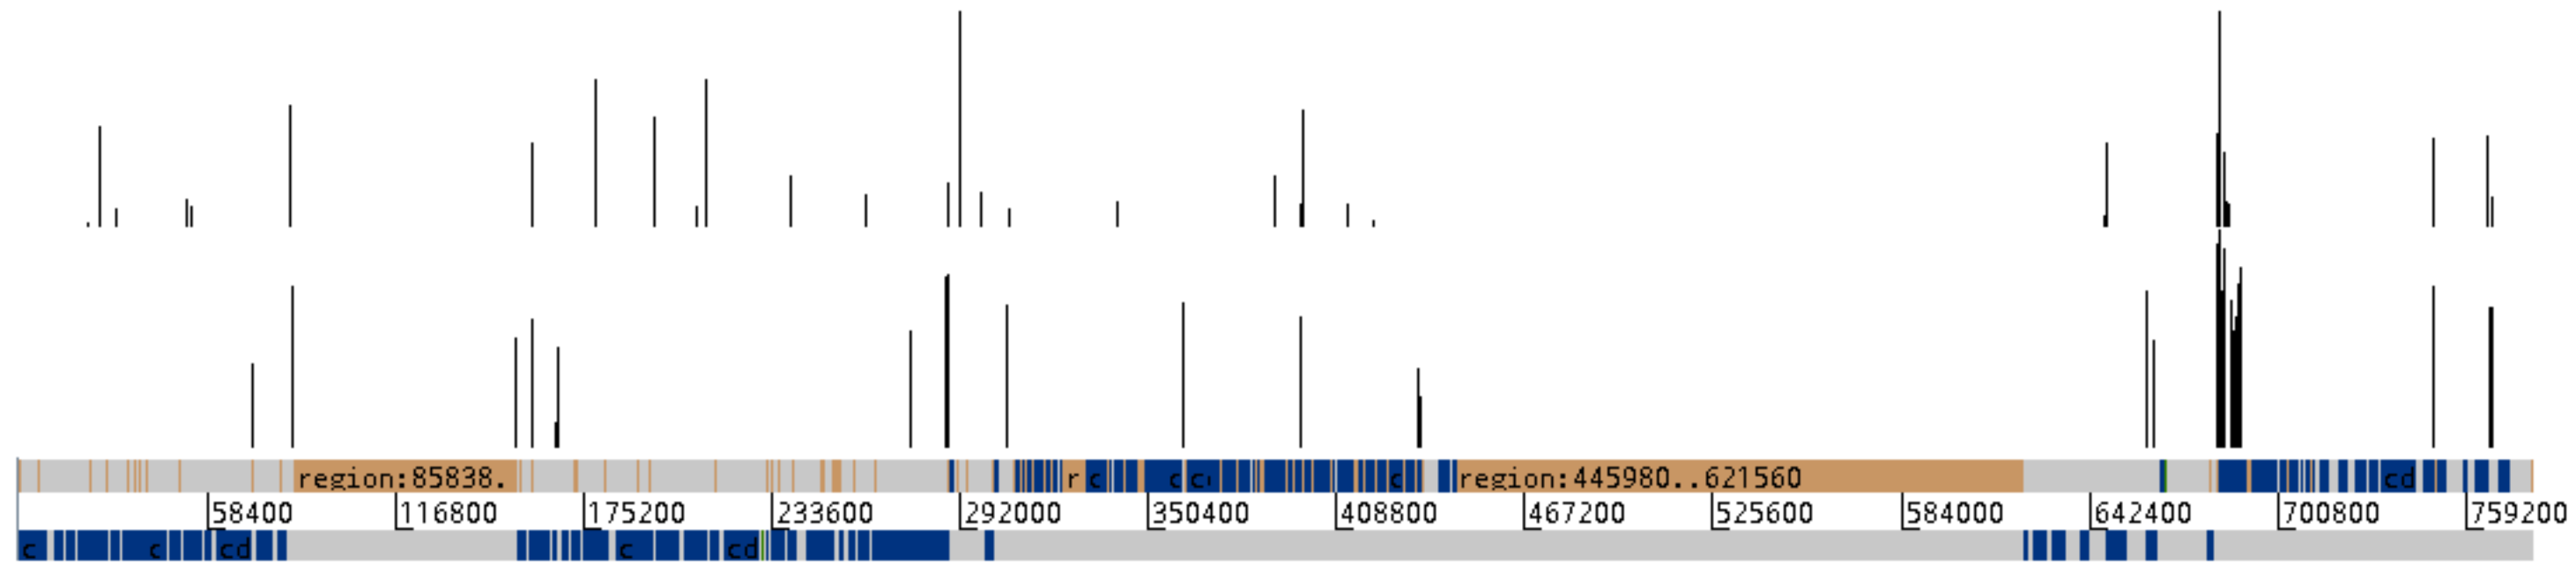



Chromosome 25

IC

RIIC

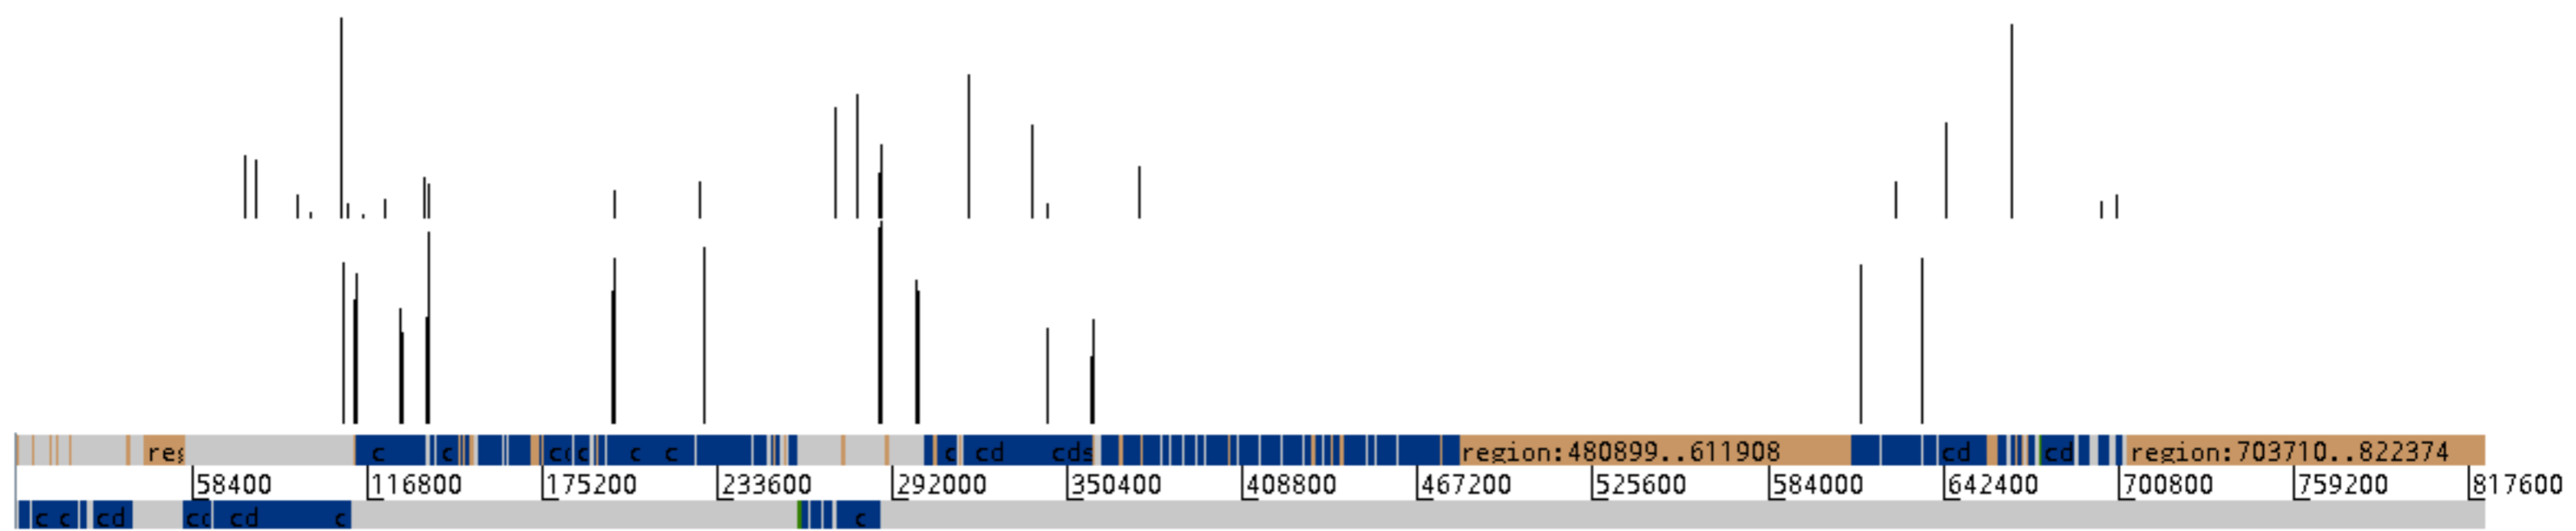

Chromosome 26

IC

RIIC

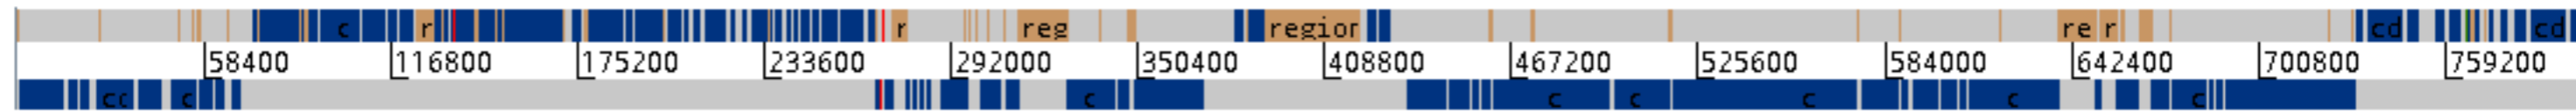

Chromosome 27

IC

RIIC

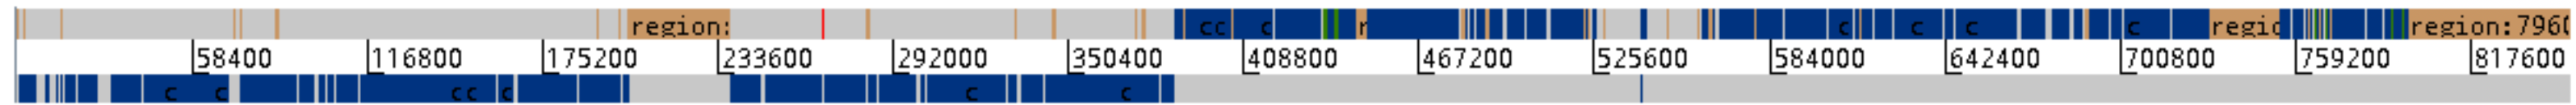

Chromosome 28

IC

RIIC

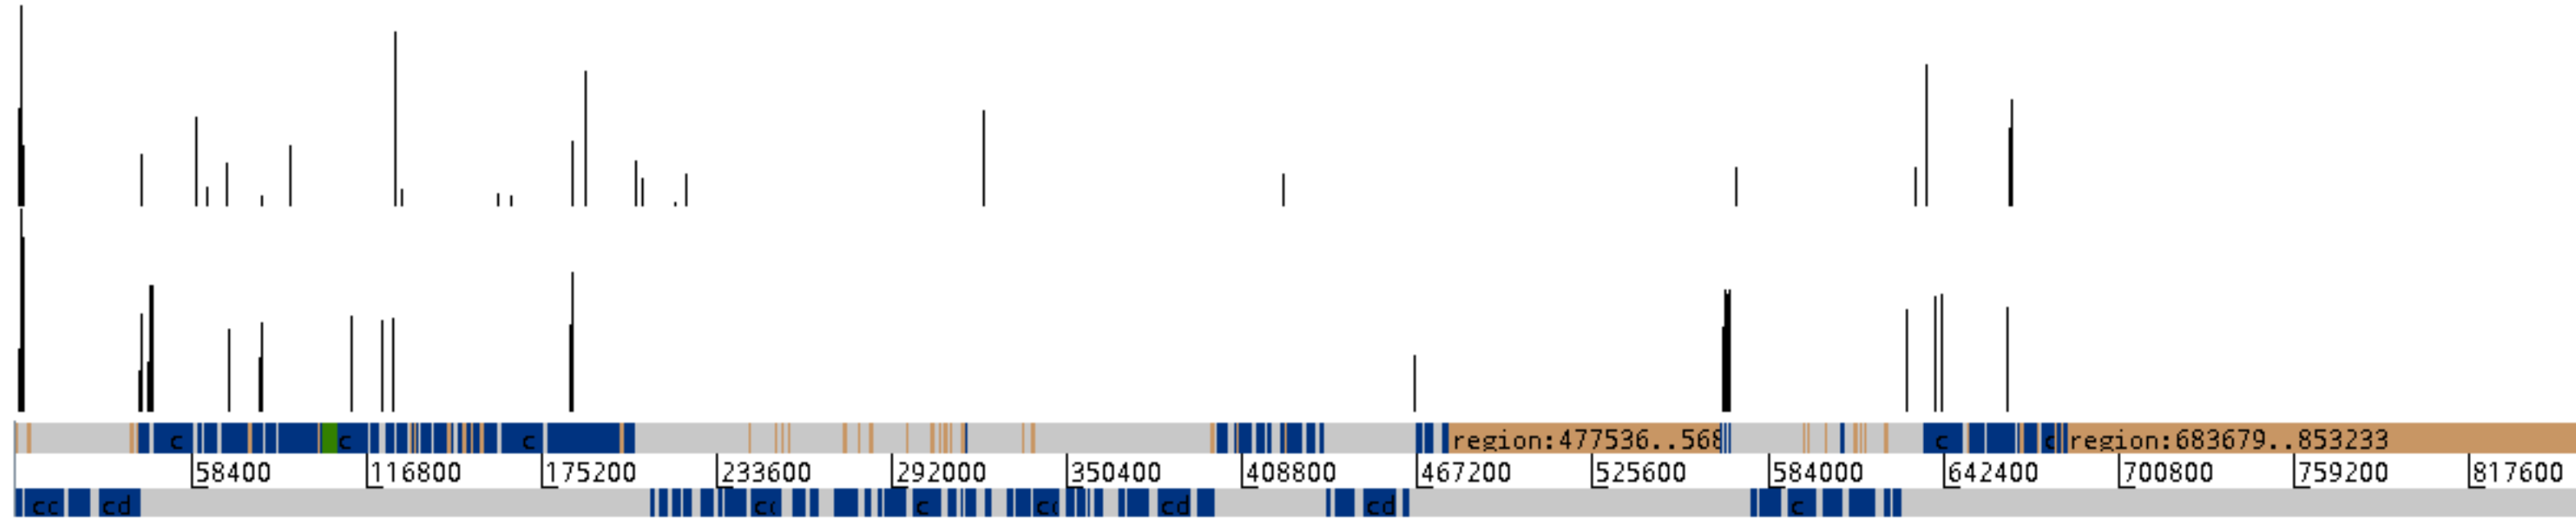

Chromosome 29

IC

RIIC

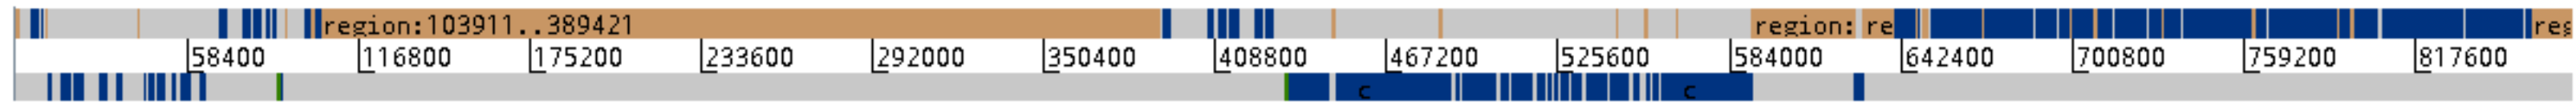

Chromosome 30

IC

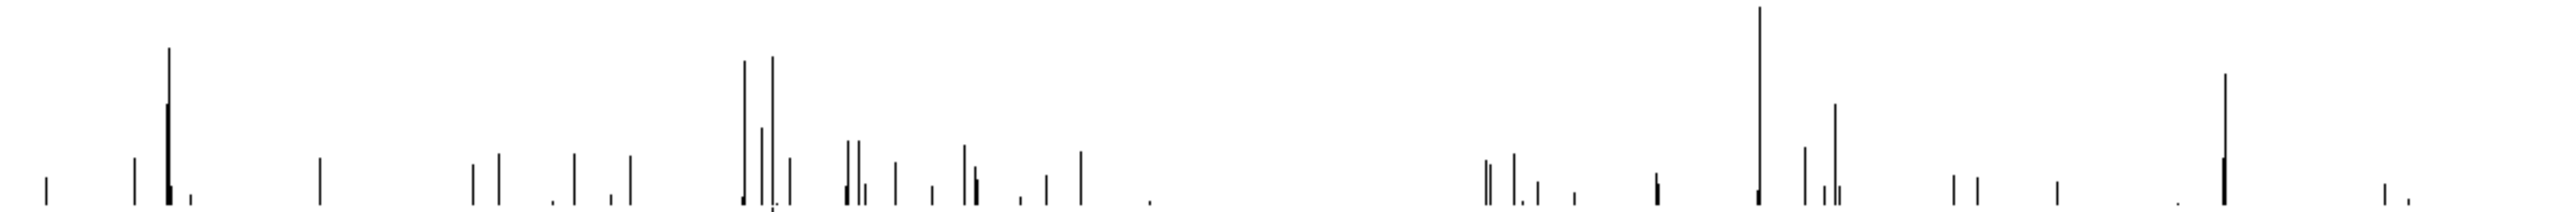

RIIC

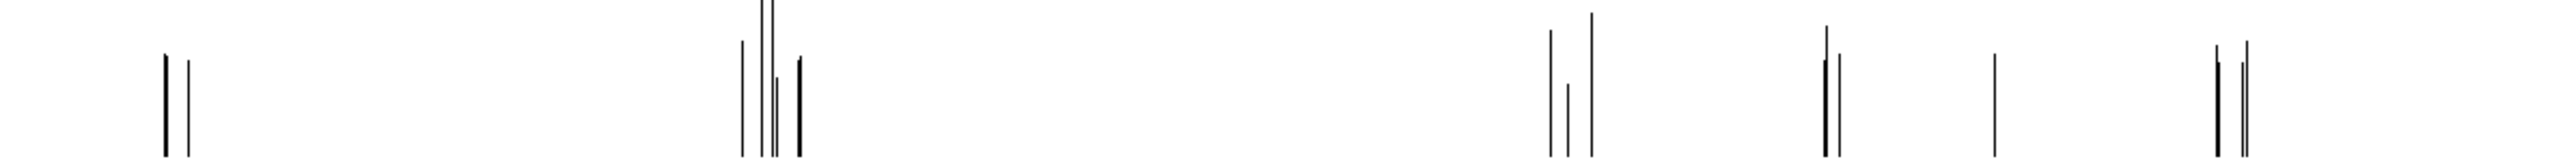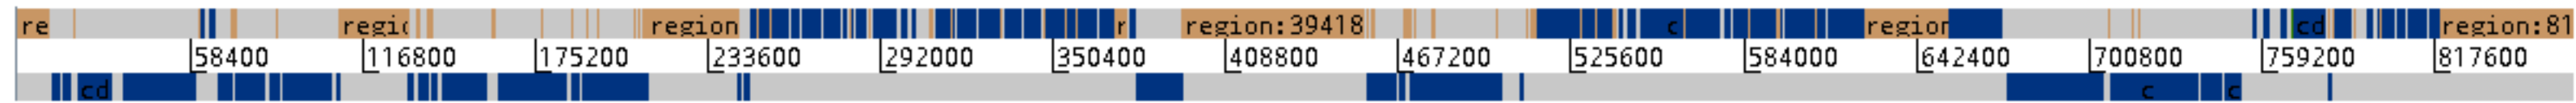

Chromosome 31

IC

RIIC

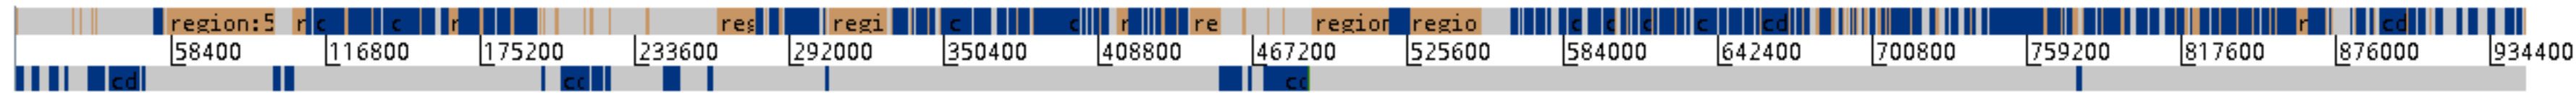

Chromosome 32

IC

RIIC

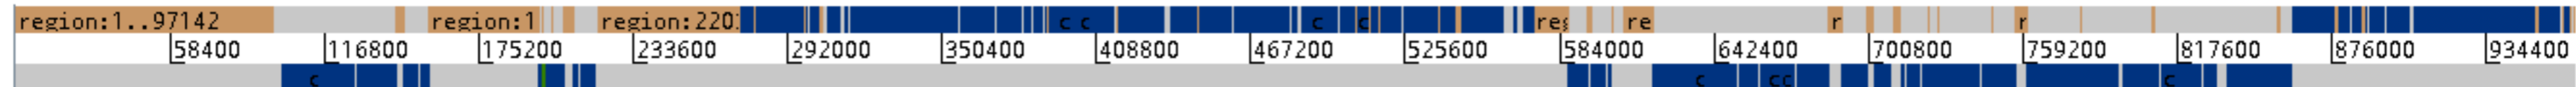



Chromosome 33

IC

RIIC

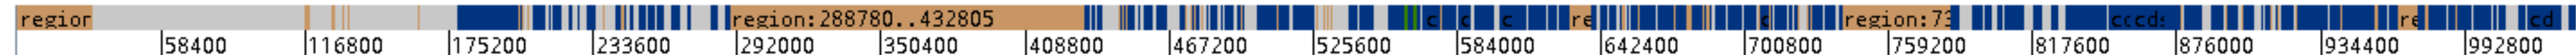

Chromosome 34

IC

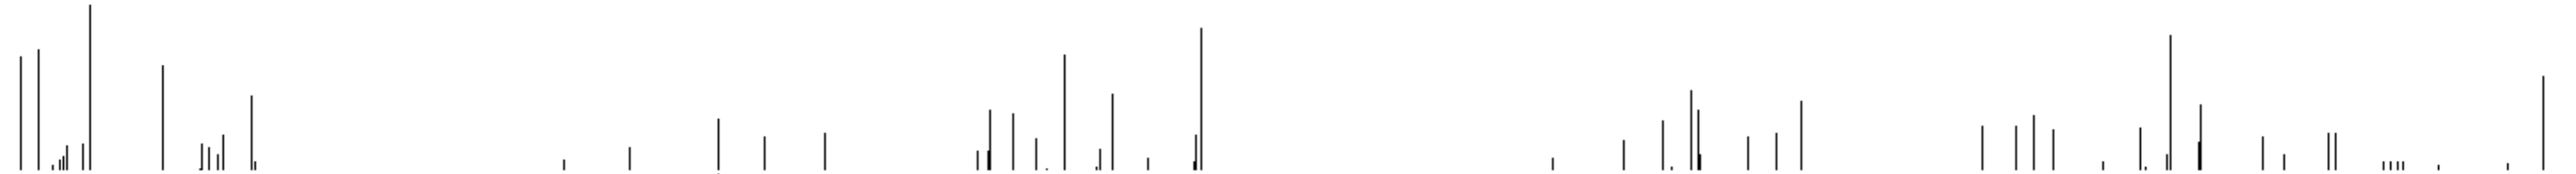

RIIC

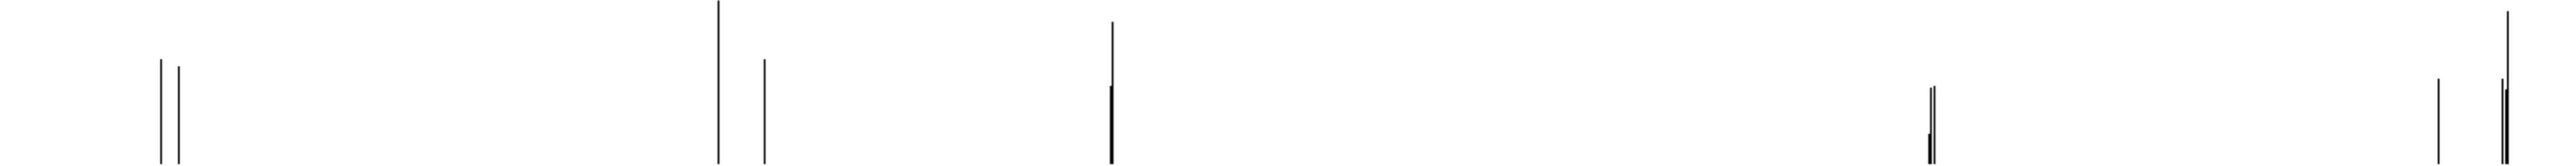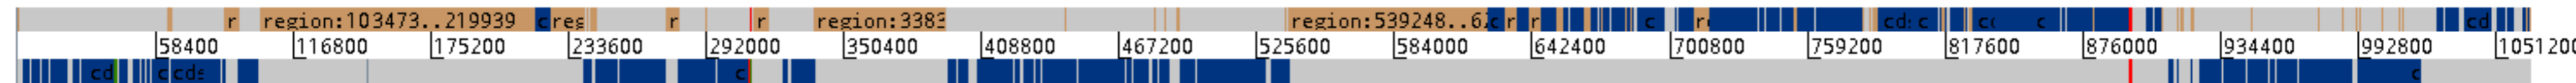

Chromosome 35

IC

RIIC

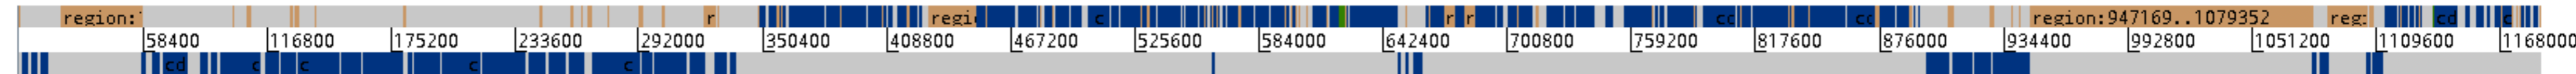

Chromosome 36

IC

RIIC

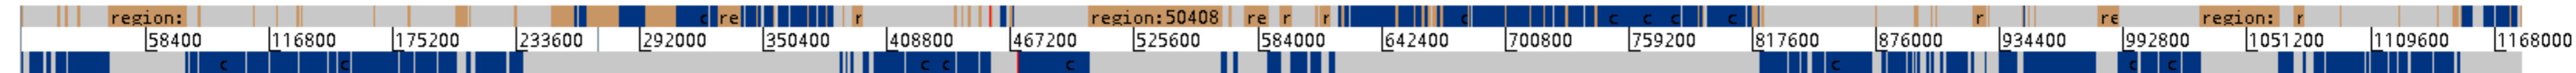

Chromosome 37

IC

RIIC

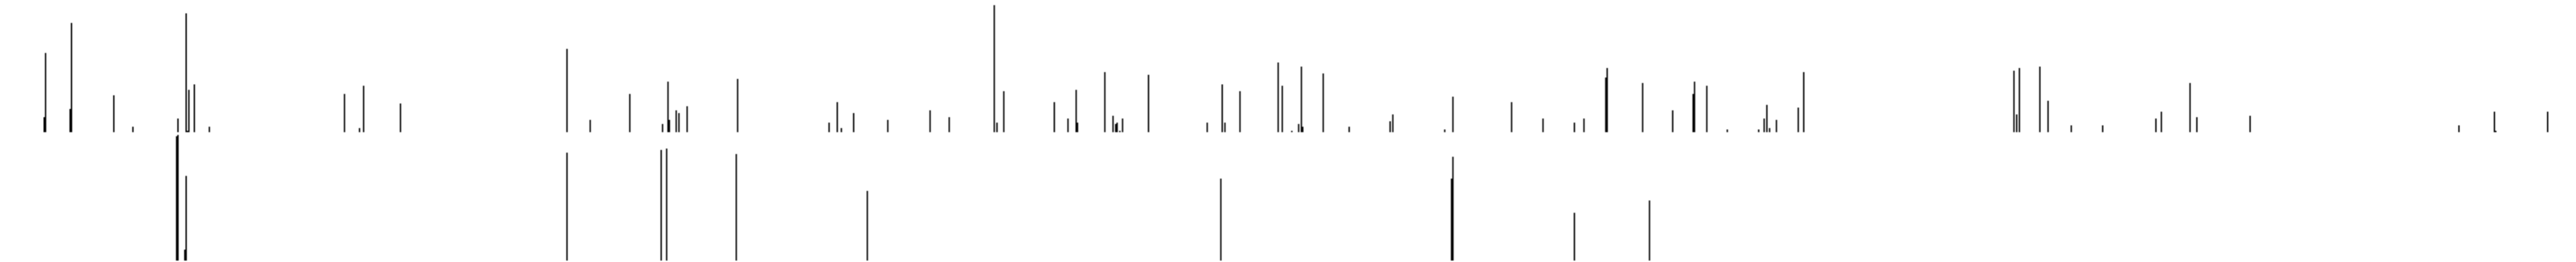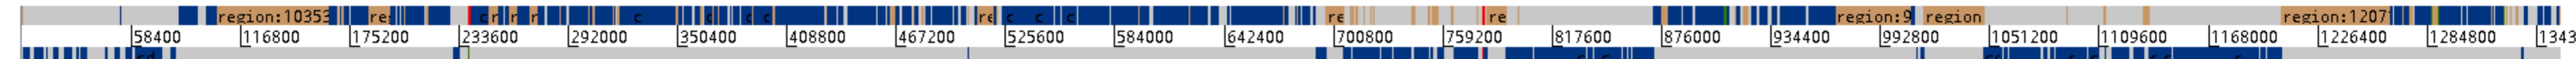

Chromosome 38

IC

RIIC

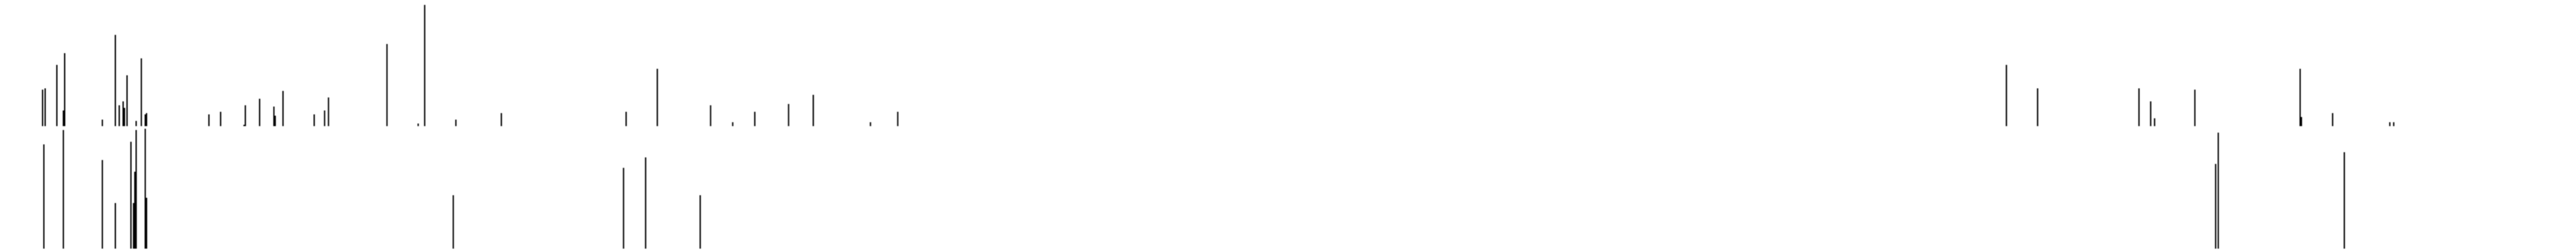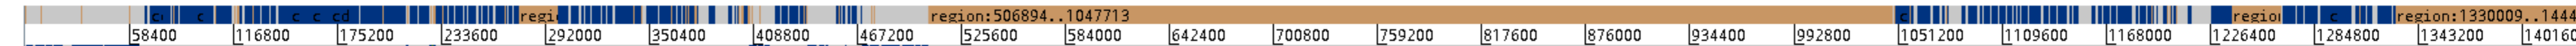

IC

RIIC

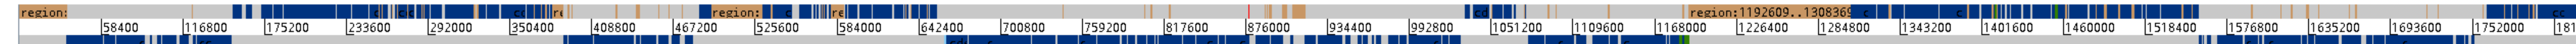

Chromosome 40

IC

RIIC

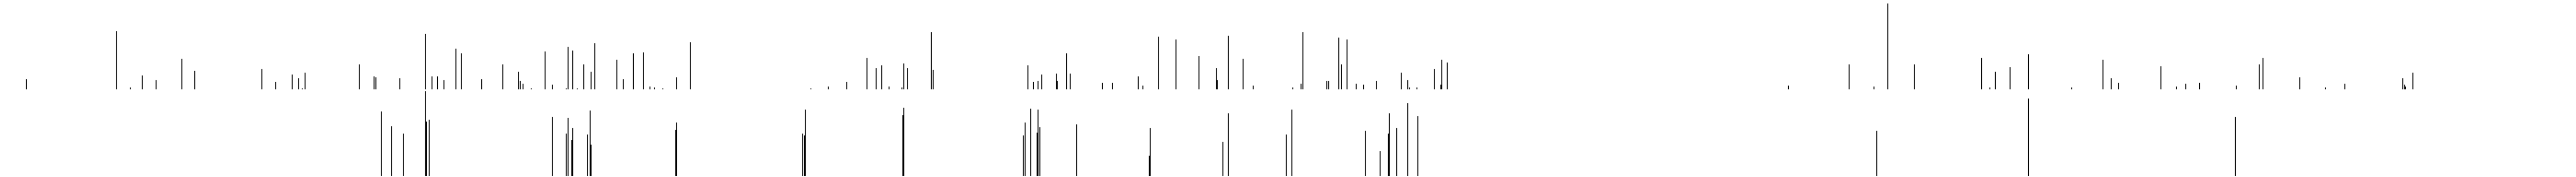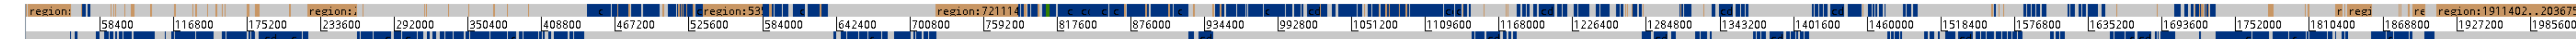



IC

RIIC

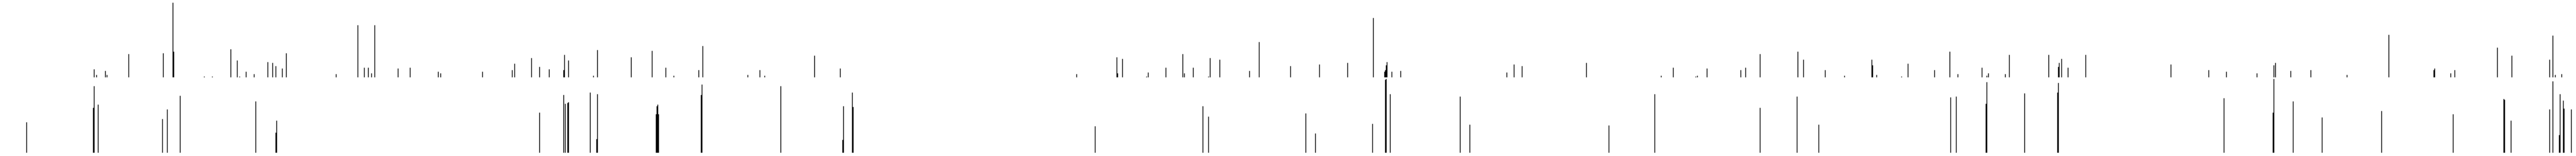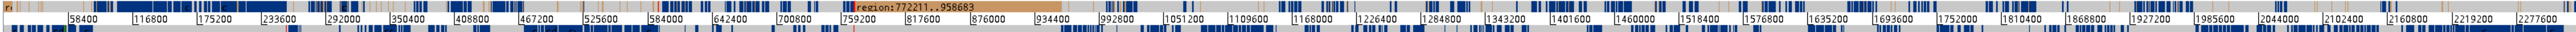

Supplement: 13104_2017_2908_MOESM3_ESM.pdf [file 13104_2017_2908_MOESM3_ESM.pdf]
