# Supplementary material for: Intrinsic DNA curvature in trypanosomes
Source: PubMed Central journal article supplement (PMC5679330; doi:10.1186/s13104-017-2908-y), 2017-11-09

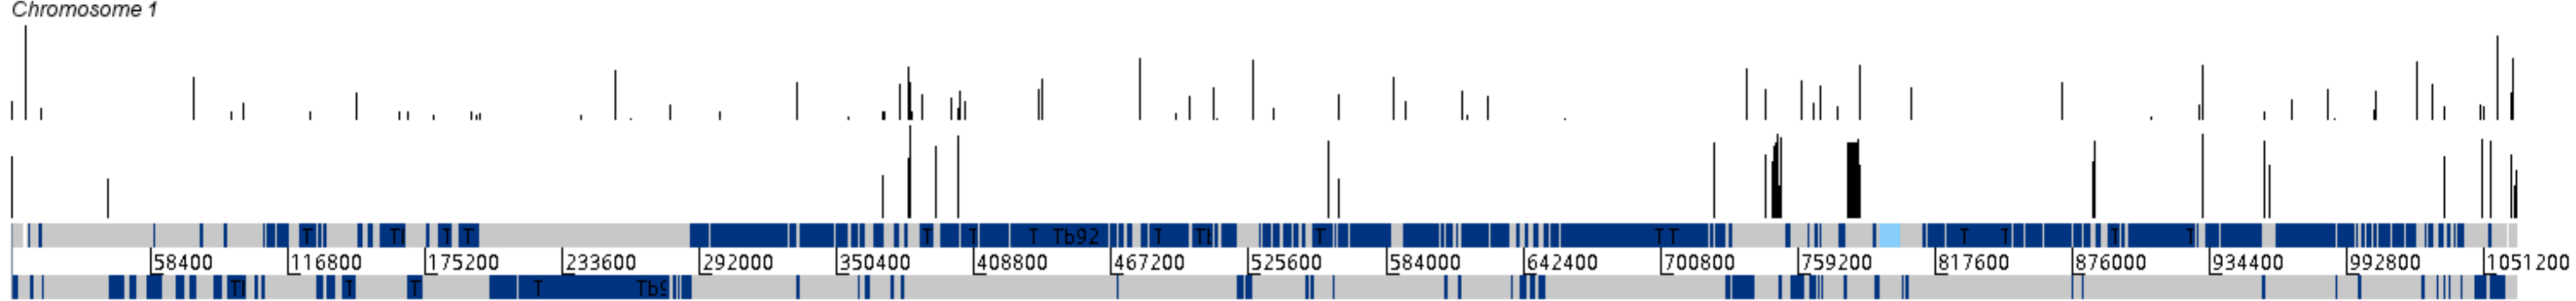

Chromosome 2

IC

RIIC

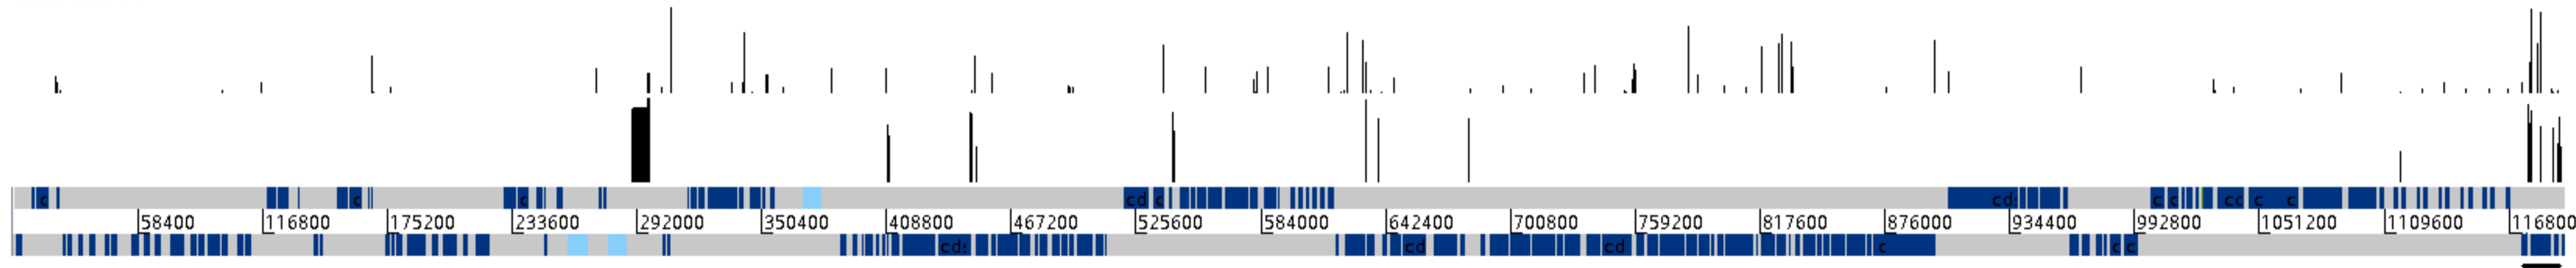

Chromosome 3

IC

RIIC

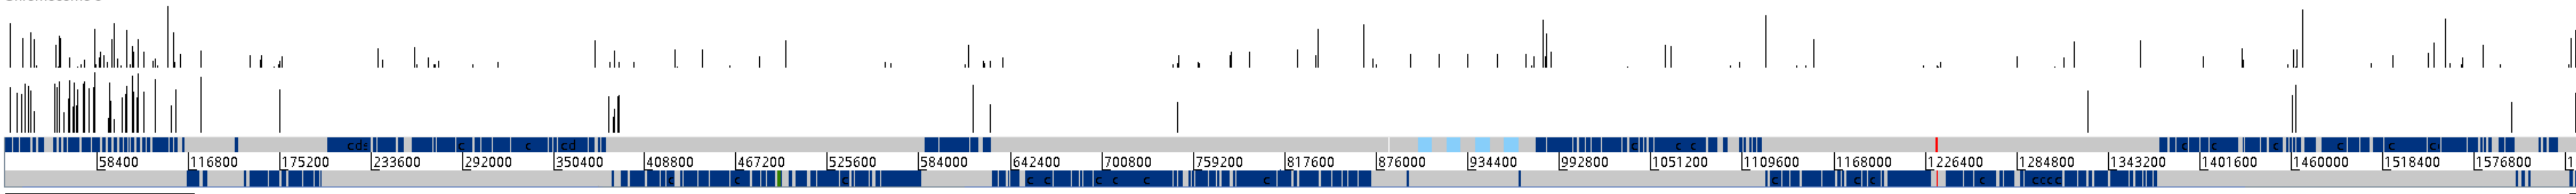

58400 116800 175200 233600 292000 350400 408800 467200 525600 584000 642400 700800 759200 817600 876000 934400 992800 1051200 1109600 1168000 1226400 1284800 1343200 1401600 1460000 1518400 1576800 1635200

Chromosome 4

IC

RIIC

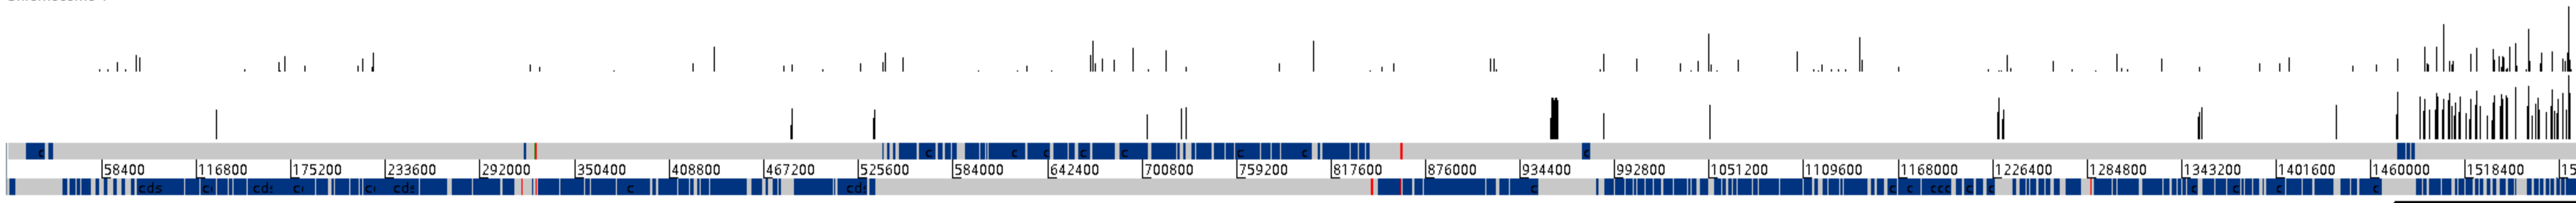

58400 116800 175200 233600 292000 350400 408800 467200 525600 584000 642400 700800 759200 817600 876000 934400 992800 1051200 1109600 1168000 1226400 1284800 1343200 1401600 1460000 1518400 1576800

Chromosome 5

IC

RIIC

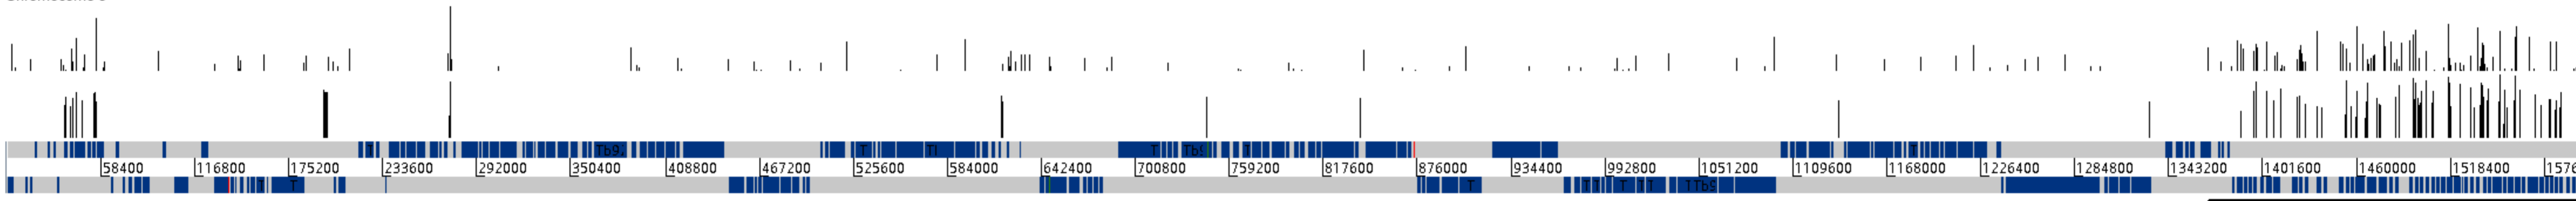

Chromosome 6

IC

RIIC

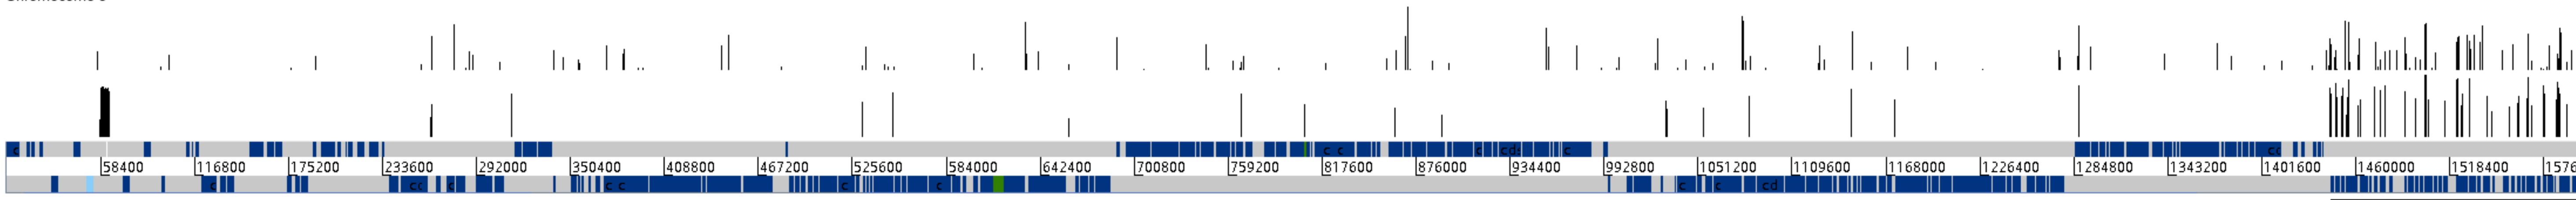

IC

RIIC

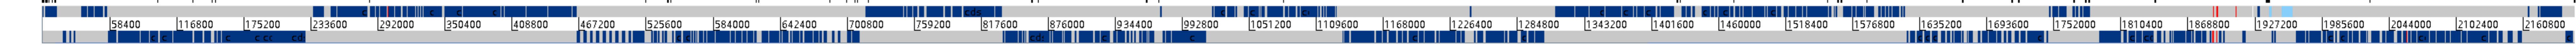

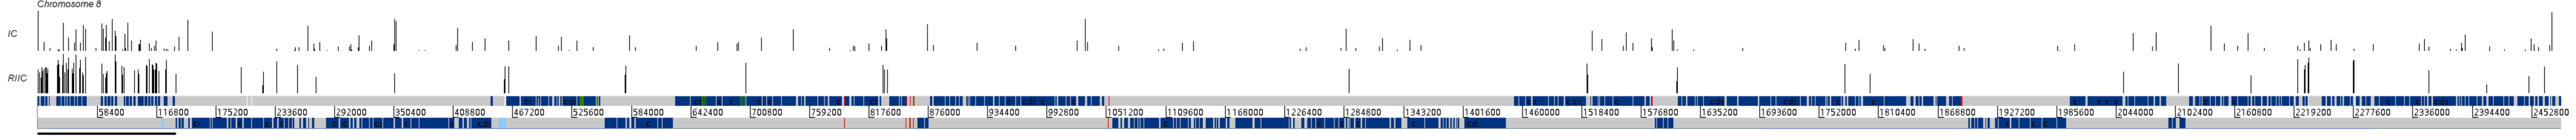



IC

RIIC

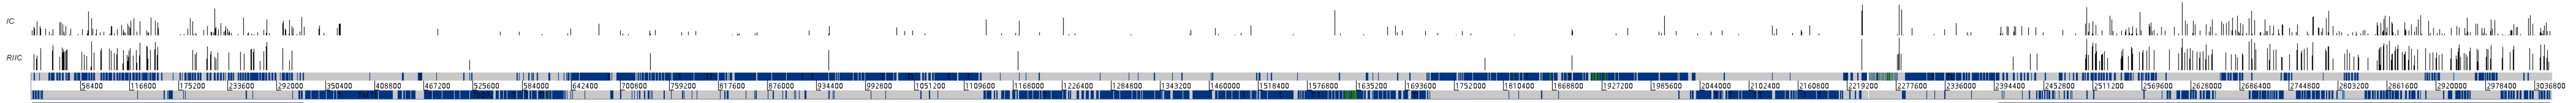

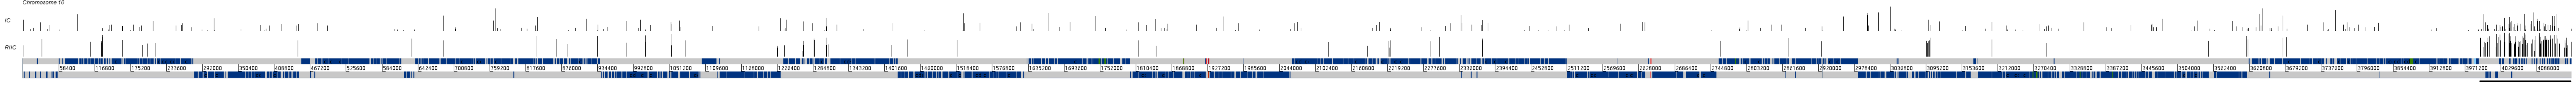

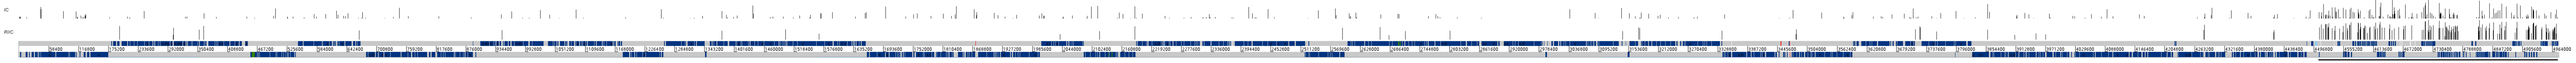

Supplement: 13104_2017_2908_MOESM4_ESM.pdf [file 13104_2017_2908_MOESM4_ESM.pdf]
