# Supplementary material for: Intrinsic DNA curvature in trypanosomes
Source: PubMed Central journal article supplement (PMC5679330; doi:10.1186/s13104-017-2908-y), 2017-11-09

# Chromosome 1

RIC

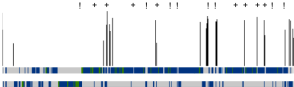

# Chromosome 2

FLIC

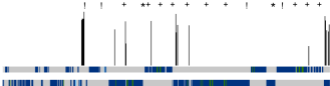

# Chromosome 3

RIC

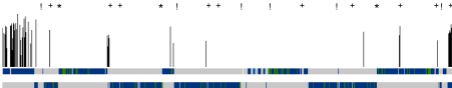

# Chromosome 4

\* + ! + + + ! ! + ! + ! + + + \* + \* + ! ! !

RIC

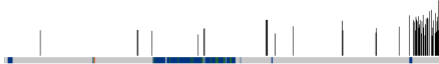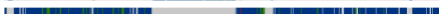

# Chromosome 5

FLIC

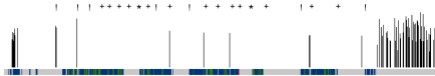

# Chromosome 6

RIC

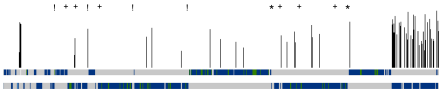

# Chromosome 7

RIC

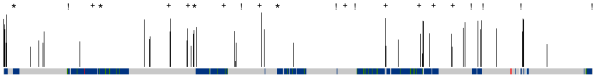

7

# Chromosome 8

RIIC

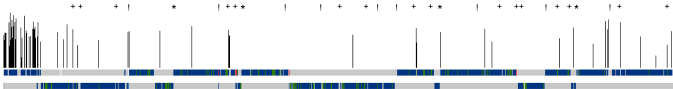



# Chromosome 9

RIC

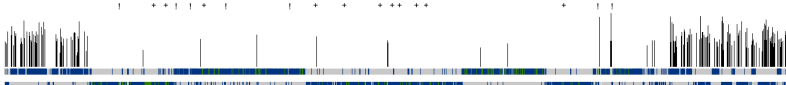

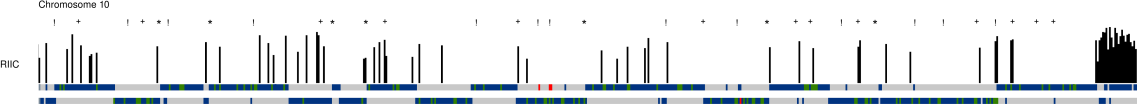

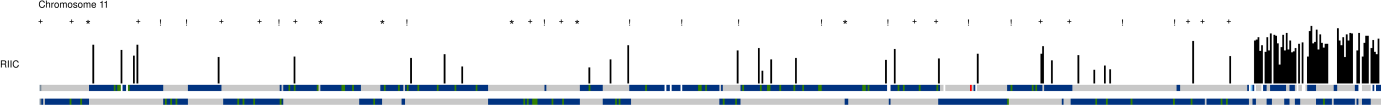

Supplement: 13104_2017_2908_MOESM5_ESM.pdf [file 13104_2017_2908_MOESM5_ESM.pdf]
